# Supplementary material
Source: MDPI journal article supplement (https://www.mdpi.com/2304-6740/6/4/119)

# checkCIF/PLATON report

You have not supplied any structure factors. As a result the full set of tests cannot be run.

THIS REPORT IS FOR GUIDANCE ONLY. IF USED AS PART OF A REVIEW PROCEDURE FOR PUBLICATION, IT SHOULD NOT REPLACE THE EXPERTISE OF AN EXPERIENCED CRYSTALLOGRAPHIC REFEREE.

No syntax errors found.      CIF dictionary      Interpreting this report

## Datablock: MeSipyO3

---

Bond precision:    C-C = 0.0021 A

Wavelength=0.71073

Cell:                a=9.1581(7)                b=9.3250(7)                c=11.4078(9)  
                      alpha=92.440(6)        beta=109.582(6)        gamma=116.898(6)  
Temperature:        200 K

|                | Calculated       | Reported         |
|----------------|------------------|------------------|
| Volume         | 796.41(13)       | 796.41(12)       |
| Space group    | P -1             | P -1             |
| Hall group     | -P 1             | -P 1             |
| Moiety formula | C16 H15 N3 O3 Si | C16 H15 N3 O3 Si |
| Sum formula    | C16 H15 N3 O3 Si | C16 H15 N3 O3 Si |
| Mr             | 325.40           | 325.40           |
| Dx,g cm-3      | 1.357            | 1.357            |
| Z              | 2                | 2                |
| Mu (mm-1)      | 0.166            | 0.166            |
| F000           | 340.0            | 340.0            |
| F000'          | 340.30           |                  |
| h,k,lmax       | 12,12,15         | 12,12,15         |
| Nref           | 3839             | 3836             |
| Tmin,Tmax      | 0.946,0.964      | 0.958,0.989      |
| Tmin'          | 0.944            |                  |

Correction method= # Reported T Limits: Tmin=0.958 Tmax=0.989  
AbsCorr = INTEGRATION

Data completeness= 0.999

Theta(max)= 28.000

R(reflections)= 0.0343( 3284)

wR2(reflections)= 0.0925( 3836)

S = 1.066

Npar= 209

---

The following ALERTS were generated. Each ALERT has the format

**test-name\_ALERT\_alert-type\_alert-level.**

Click on the hyperlinks for more details of the test.



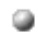

## Alert level G

|                   |                                                  |              |
|-------------------|--------------------------------------------------|--------------|
| PLAT154_ALERT_1_G | The s.u.'s on the Cell Angles are Equal ..(Note) | 0.006 Degree |
| PLAT395_ALERT_2_G | Deviating X-O-Y Angle From 120 for O1            | 128.0 Degree |
| PLAT395_ALERT_2_G | Deviating X-O-Y Angle From 120 for O2            | 129.5 Degree |
| PLAT395_ALERT_2_G | Deviating X-O-Y Angle From 120 for O3            | 124.9 Degree |

---

0 **ALERT level A** = Most likely a serious problem - resolve or explain  
0 **ALERT level B** = A potentially serious problem, consider carefully  
0 **ALERT level C** = Check. Ensure it is not caused by an omission or oversight  
4 **ALERT level G** = General information/check it is not something unexpected

1 ALERT type 1 CIF construction/syntax error, inconsistent or missing data  
3 ALERT type 2 Indicator that the structure model may be wrong or deficient  
0 ALERT type 3 Indicator that the structure quality may be low  
0 ALERT type 4 Improvement, methodology, query or suggestion  
0 ALERT type 5 Informative message, check

---

## Datablock: SipyO4

Bond precision: C-C = 0.0035 A Wavelength=0.71073

Cell: a=9.5163(7) b=9.5163(7) c=21.824(2)  
alpha=90 beta=90 gamma=90

Temperature: 200 K

|                | Calculated       | Reported         |
|----------------|------------------|------------------|
| Volume         | 1976.4(3)        | 1976.4(3)        |
| Space group    | I 41/a           | I 41/a           |
| Hall group     | -I 4ad           | -I 4ad           |
| Moiety formula | C20 H16 N4 O4 Si | C20 H16 N4 O4 Si |
| Sum formula    | C20 H16 N4 O4 Si | C20 H16 N4 O4 Si |
| Mr             | 404.46           | 404.46           |
| Dx,g cm-3      | 1.359            | 1.359            |
| Z              | 4                | 4                |
| Mu (mm-1)      | 0.153            | 0.153            |
| F000           | 840.0            | 840.0            |
| F000'          | 840.69           |                  |
| h,k,lmax       | 11,11,25         | 11,11,25         |
| Nref           | 873              | 873              |
| Tmin,Tmax      | 0.964,0.970      | 0.946,0.978      |
| Tmin'          | 0.941            |                  |

Correction method= # Reported T Limits: Tmin=0.946 Tmax=0.978  
AbsCorr = INTEGRATION

Data completeness= 1.000 Theta(max)= 24.997

R(reflections)= 0.0404( 684) wR2(reflections)= 0.1062( 873)



S = 1.137

Npar= 66

The following ALERTS were generated. Each ALERT has the format

**test-name\_ALERT\_alert-type\_alert-level.**

Click on the hyperlinks for more details of the test.

### Alert level G

PLAT395\_ALERT\_2\_G Deviating X-O-Y Angle From 120 for O1 125.2 Degree

0 **ALERT level A** = Most likely a serious problem - resolve or explain  
0 **ALERT level B** = A potentially serious problem, consider carefully  
0 **ALERT level C** = Check. Ensure it is not caused by an omission or oversight  
1 **ALERT level G** = General information/check it is not something unexpected

0 ALERT type 1 CIF construction/syntax error, inconsistent or missing data  
1 ALERT type 2 Indicator that the structure model may be wrong or deficient  
0 ALERT type 3 Indicator that the structure quality may be low  
0 ALERT type 4 Improvement, methodology, query or suggestion  
0 ALERT type 5 Informative message, check

## Datablock: compound\_1

Bond precision: C-C = 0.0047 A

Wavelength=0.71073

Cell: a=14.8719(5) b=10.5112(5) c=39.3020(13)

alpha=90 beta=95.404(3) gamma=90

Temperature: 180 K

|                        | Calculated                          | Reported                            |
|------------------------|-------------------------------------|-------------------------------------|
| Volume                 | 6116.4(4)                           | 6116.4(4)                           |
| Space group            | C 2/c                               | C 2/c                               |
| Hall group             | -C 2yc                              | -C 2yc                              |
| Moiety formula         | C21 H19 N4 O4 Pd Si, 2(C H C13), Cl | C21 H19 N4 O4 Pd Si, 2(C H C13), Cl |
| Sum formula            | C23 H21 Cl7 N4 O4 Pd Si             | C23 H21 Cl7 N4 O4 Pd Si             |
| Mr                     | 800.08                              | 800.08                              |
| Dx, g cm <sup>-3</sup> | 1.738                               | 1.738                               |
| Z                      | 8                                   | 8                                   |
| Mu (mm <sup>-1</sup> ) | 1.295                               | 1.295                               |
| F000                   | 3184.0                              | 3184.0                              |
| F000'                  | 3185.84                             |                                     |
| h,k,lmax               | 17,12,46                            | 17,12,46                            |
| Nref                   | 5384                                | 5379                                |
| Tmin,Tmax              | 0.685,0.950                         | 0.656,0.973                         |
| Tmin'                  | 0.590                               |                                     |

Correction method= # Reported T Limits: Tmin=0.656 Tmax=0.973

AbsCorr = INTEGRATION



Data completeness= 0.999

Theta(max)= 24.998

R(reflections)= 0.0339( 4642)

wR2(reflections)= 0.0818( 5379)

S = 1.147

Npar= 403

---

The following ALERTS were generated. Each ALERT has the format

**test-name\_ALERT\_alert-type\_alert-level.**

Click on the hyperlinks for more details of the test.

---

### Alert level G

|                   |                                                  |       |        |
|-------------------|--------------------------------------------------|-------|--------|
| PLAT002_ALERT_2_G | Number of Distance or Angle Restraints on AtSite | 11    | Note   |
| PLAT083_ALERT_2_G | SHELXL Second Parameter in WGHT Unusually Large  | 29.87 | Why ?  |
| PLAT171_ALERT_4_G | The CIF-Embedded .res File Contains EADP Records | 5     | Report |
| PLAT176_ALERT_4_G | The CIF-Embedded .res File Contains SADI Records | 4     | Report |
| PLAT302_ALERT_4_G | Anion/Solvent/Minor-Residue Disorder (Resd 2 )   | 100%  | Note   |
| PLAT302_ALERT_4_G | Anion/Solvent/Minor-Residue Disorder (Resd 3 )   | 100%  | Note   |
| PLAT302_ALERT_4_G | Anion/Solvent/Minor-Residue Disorder (Resd 4 )   | 100%  | Note   |
| PLAT302_ALERT_4_G | Anion/Solvent/Minor-Residue Disorder (Resd 5 )   | 100%  | Note   |
| PLAT304_ALERT_4_G | Non-Integer Number of Atoms in ..... Resd 2      | 2.75  | Check  |
| PLAT304_ALERT_4_G | Non-Integer Number of Atoms in ..... Resd 3      | 4.82  | Check  |
| PLAT304_ALERT_4_G | Non-Integer Number of Atoms in ..... Resd 4      | 2.25  | Check  |
| PLAT304_ALERT_4_G | Non-Integer Number of Atoms in ..... Resd 5      | 0.17  | Check  |
| PLAT395_ALERT_2_G | Deviating X-O-Y Angle From 120 for O1            | 129.5 | Degree |
| PLAT395_ALERT_2_G | Deviating X-O-Y Angle From 120 for O2            | 131.4 | Degree |
| PLAT395_ALERT_2_G | Deviating X-O-Y Angle From 120 for O3            | 128.7 | Degree |
| PLAT395_ALERT_2_G | Deviating X-O-Y Angle From 120 for O4            | 129.1 | Degree |
| PLAT794_ALERT_5_G | Tentative Bond Valency for Pd1 (II) .            | 2.33  | Info   |
| PLAT860_ALERT_3_G | Number of Least-Squares Restraints .....         | 18    | Note   |

---

0 **ALERT level A** = Most likely a serious problem - resolve or explain  
0 **ALERT level B** = A potentially serious problem, consider carefully  
0 **ALERT level C** = Check. Ensure it is not caused by an omission or oversight  
18 **ALERT level G** = General information/check it is not something unexpected

0 ALERT type 1 CIF construction/syntax error, inconsistent or missing data  
6 ALERT type 2 Indicator that the structure model may be wrong or deficient  
1 ALERT type 3 Indicator that the structure quality may be low  
10 ALERT type 4 Improvement, methodology, query or suggestion  
1 ALERT type 5 Informative message, check

---

## Datablock: compound\_2

---

Bond precision: C-C = 0.0043 A

Wavelength=0.71073

Cell: a=8.7497(4) b=9.2334(5) c=23.5781(13)  
alpha=88.255(4) beta=89.283(4) gamma=68.654(4)

Temperature: 200 K



|                | Calculated             | Reported               |
|----------------|------------------------|------------------------|
| Volume         | 1773.36(17)            | 1773.36(17)            |
| Space group    | P -1                   | P -1                   |
| Hall group     | -P 1                   | -P 1                   |
| Moiety formula | C16 H15 Cl Cu N3 O3 Si | C16 H15 Cl Cu N3 O3 Si |
| Sum formula    | C16 H15 Cl Cu N3 O3 Si | C16 H15 Cl Cu N3 O3 Si |
| Mr             | 424.40                 | 424.39                 |
| Dx,g cm-3      | 1.590                  | 1.590                  |
| Z              | 4                      | 4                      |
| Mu (mm-1)      | 1.470                  | 1.470                  |
| F000           | 864.0                  | 864.0                  |
| F000'          | 866.44                 |                        |
| h,k,lmax       | 11,12,31               | 11,12,31               |
| Nref           | 8572                   | 8555                   |
| Tmin,Tmax      | 0.710,0.863            | 0.769,0.909            |
| Tmin'          | 0.686                  |                        |

Correction method= # Reported T Limits: Tmin=0.769 Tmax=0.909  
AbsCorr = INTEGRATION

Data completeness= 0.998                      Theta(max)= 27.999

R(reflections)= 0.0350( 7263)              wR2(reflections)= 0.0900( 8555)

S = 1.073                                      Npar= 453

The following ALERTS were generated. Each ALERT has the format

**test-name\_ALERT\_alert-type\_alert-level.**

Click on the hyperlinks for more details of the test.

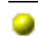

#### Alert level C

|                   |                                                  |      |        |
|-------------------|--------------------------------------------------|------|--------|
| PLAT094_ALERT_2_C | Ratio of Maximum / Minimum Residual Density .... | 2.78 | Report |
| PLAT241_ALERT_2_C | High 'MainMol' Ueq as Compared to Neighbors of   | 01   | Check  |
| PLAT241_ALERT_2_C | High 'MainMol' Ueq as Compared to Neighbors of   | 02   | Check  |
| PLAT242_ALERT_2_C | Low 'MainMol' Ueq as Compared to Neighbors of    | Si1  | Check  |

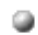

#### Alert level G

|                   |                                                  |       |        |
|-------------------|--------------------------------------------------|-------|--------|
| PLAT154_ALERT_1_G | The s.u.'s on the Cell Angles are Equal ..(Note) | 0.004 | Degree |
| PLAT232_ALERT_2_G | Hirshfeld Test Diff (M-X) Cu1 --Cl1 .            | 7.0   | s.u.   |
| PLAT395_ALERT_2_G | Deviating X-O-Y Angle From 120 for O1            | 140.4 | Degree |
| PLAT395_ALERT_2_G | Deviating X-O-Y Angle From 120 for O2            | 139.4 | Degree |
| PLAT395_ALERT_2_G | Deviating X-O-Y Angle From 120 for O3            | 142.1 | Degree |
| PLAT395_ALERT_2_G | Deviating X-O-Y Angle From 120 for O4            | 138.0 | Degree |
| PLAT395_ALERT_2_G | Deviating X-O-Y Angle From 120 for O5            | 136.6 | Degree |
| PLAT395_ALERT_2_G | Deviating X-O-Y Angle From 120 for O6            | 141.2 | Degree |
| PLAT933_ALERT_2_G | Number of OMIT Records in Embedded .res File ... | 10    | Note   |

0 **ALERT level A** = Most likely a serious problem - resolve or explain

0 **ALERT level B** = A potentially serious problem, consider carefully

4 **ALERT level C** = Check. Ensure it is not caused by an omission or oversight



9 **ALERT level G** = General information/check it is not something unexpected

1 ALERT type 1 CIF construction/syntax error, inconsistent or missing data  
12 ALERT type 2 Indicator that the structure model may be wrong or deficient  
0 ALERT type 3 Indicator that the structure quality may be low  
0 ALERT type 4 Improvement, methodology, query or suggestion  
0 ALERT type 5 Informative message, check

---

## Datablock: compound\_3

---

Bond precision: C-C = 0.0027 Å

Wavelength=0.71073

Cell: a=18.3774(5) b=18.3774(5) c=26.4847(8)  
alpha=90 beta=90 gamma=90  
Temperature: 200 K

|                        | Calculated             | Reported               |
|------------------------|------------------------|------------------------|
| Volume                 | 8944.7(6)              | 8944.6(6)              |
| Space group            | I 41/a                 | I 41/a                 |
| Hall group             | -I 4ad                 | -I 4ad                 |
| Moiety formula         | C21 H19 Cl Cu N4 O4 Si | C21 H19 Cl Cu N4 O4 Si |
| Sum formula            | C21 H19 Cl Cu N4 O4 Si | C21 H19 Cl Cu N4 O4 Si |
| Mr                     | 518.49                 | 518.48                 |
| Dx, g cm <sup>-3</sup> | 1.540                  | 1.540                  |
| Z                      | 16                     | 16                     |
| Mu (mm <sup>-1</sup> ) | 1.186                  | 1.186                  |
| F000                   | 4240.0                 | 4240.0                 |
| F000'                  | 4250.13                |                        |
| h,k,lmax               | 24,24,34               | 24,24,34               |
| Nref                   | 5397                   | 5409                   |
| Tmin,Tmax              | 0.708,0.837            | 0.854,0.948            |
| Tmin'                  | 0.694                  |                        |

Correction method= # Reported T Limits: Tmin=0.854 Tmax=0.948  
AbsCorr = INTEGRATION

Data completeness= 1.002

Theta(max)= 27.997

R(reflections)= 0.0278( 4692)

wR2(reflections)= 0.0712( 5409)

S = 1.081

Npar= 290

---

The following ALERTS were generated. Each ALERT has the format  
**test-name\_ALERT\_alert-type\_alert-level**.  
Click on the hyperlinks for more details of the test.

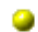

### Alert level C

PLAT601\_ALERT\_2\_C Structure Contains Solvent Accessible VOIDS of .

35 Ang\*\*3



---

**Alert level G**

|                   |                                                  |                       |       |        |
|-------------------|--------------------------------------------------|-----------------------|-------|--------|
| PLAT083_ALERT_2_G | SHELXL Second Parameter in WGHT                  | Unusually Large       | 6.87  | Why ?  |
| PLAT232_ALERT_2_G | Hirshfeld Test Diff (M-X) Cu1                    | --Si1                 | 8.0   | s.u.   |
| PLAT395_ALERT_2_G | Deviating X-O-Y                                  | Angle From 120 for O1 | 132.6 | Degree |
| PLAT395_ALERT_2_G | Deviating X-O-Y                                  | Angle From 120 for O2 | 130.0 | Degree |
| PLAT395_ALERT_2_G | Deviating X-O-Y                                  | Angle From 120 for O3 | 128.6 | Degree |
| PLAT395_ALERT_2_G | Deviating X-O-Y                                  | Angle From 120 for O4 | 130.3 | Degree |
| PLAT794_ALERT_5_G | Tentative Bond Valency for Cu1                   | (II)                  | 2.18  | Info   |
| PLAT933_ALERT_2_G | Number of OMIT Records in Embedded .res File ... |                       | 2     | Note   |

---

0 **ALERT level A** = Most likely a serious problem - resolve or explain  
 0 **ALERT level B** = A potentially serious problem, consider carefully  
 1 **ALERT level C** = Check. Ensure it is not caused by an omission or oversight  
 8 **ALERT level G** = General information/check it is not something unexpected

0 ALERT type 1 CIF construction/syntax error, inconsistent or missing data  
 8 ALERT type 2 Indicator that the structure model may be wrong or deficient  
 0 ALERT type 3 Indicator that the structure quality may be low  
 0 ALERT type 4 Improvement, methodology, query or suggestion  
 1 ALERT type 5 Informative message, check

---

## Datablock: compound\_3\_CHCl3

---

|                 |                                    |                                    |
|-----------------|------------------------------------|------------------------------------|
| Bond precision: | C-C = 0.0052 A                     | Wavelength=0.71073                 |
| Cell:           | a=9.2616(4)                        | b=15.6201(7) c=9.2773(5)           |
|                 | alpha=90                           | beta=93.049(4) gamma=90            |
| Temperature:    | 200 K                              |                                    |
|                 | Calculated                         | Reported                           |
| Volume          | 1340.22(11)                        | 1340.22(11)                        |
| Space group     | P 21                               | P 21                               |
| Hall group      | P 2yb                              | P 2yb                              |
| Moiety formula  | C21 H19 Cl Cu N4 O4 Si, C<br>H Cl3 | C21 H19 Cl Cu N4 O4 Si, C<br>H Cl3 |
| Sum formula     | C22 H20 Cl4 Cu N4 O4 Si            | C22 H20 Cl4 Cu N4 O4 Si            |
| Mr              | 637.86                             | 637.85                             |
| Dx,g cm-3       | 1.581                              | 1.581                              |
| Z               | 2                                  | 2                                  |
| Mu (mm-1)       | 1.295                              | 1.295                              |
| F000            | 646.0                              | 646.0                              |
| F000'           | 648.17                             |                                    |
| h,k,lmax        | 12,20,12                           | 12,20,12                           |
| Nref            | 6454[ 3344]                        | 6449                               |
| Tmin,Tmax       | 0.685,0.879                        | 0.666,0.869                        |
| Tmin'           | 0.629                              |                                    |

Correction method= # Reported T Limits: Tmin=0.666 Tmax=0.869  
 AbsCorr = INTEGRATION



Data completeness= 1.93/1.00      Theta(max)= 27.997  
R(reflections)= 0.0269( 6105)      wR2(reflections)= 0.0639( 6449)  
S = 1.060      Npar= 326

---

The following ALERTS were generated. Each ALERT has the format

**test-name\_ALERT\_alert-type\_alert-level.**

Click on the hyperlinks for more details of the test.

---

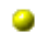

#### Alert level C

PLAT244\_ALERT\_4\_C Low      'Solvent' Ueq as Compared to Neighbors of      C22 Check

---

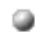

#### Alert level G

PLAT232\_ALERT\_2\_G Hirshfeld Test Diff (M-X) Cu1      --N3      .      5.1 s.u.  
PLAT395\_ALERT\_2\_G Deviating X-O-Y      Angle From 120 for O1      130.1 Degree  
PLAT395\_ALERT\_2\_G Deviating X-O-Y      Angle From 120 for O2      130.8 Degree  
PLAT395\_ALERT\_2\_G Deviating X-O-Y      Angle From 120 for O3      131.0 Degree  
PLAT395\_ALERT\_2\_G Deviating X-O-Y      Angle From 120 for O4      130.3 Degree  
PLAT794\_ALERT\_5\_G Tentative Bond Valency for Cu1      (II)      .      2.17 Info

---

0 **ALERT level A** = Most likely a serious problem - resolve or explain  
0 **ALERT level B** = A potentially serious problem, consider carefully  
1 **ALERT level C** = Check. Ensure it is not caused by an omission or oversight  
6 **ALERT level G** = General information/check it is not something unexpected

0 ALERT type 1 CIF construction/syntax error, inconsistent or missing data  
5 ALERT type 2 Indicator that the structure model may be wrong or deficient  
0 ALERT type 3 Indicator that the structure quality may be low  
1 ALERT type 4 Improvement, methodology, query or suggestion  
1 ALERT type 5 Informative message, check

---

## Datablock: compound\_4

---

Bond precision:    C-C = 0.0028 A      Wavelength=0.71073  
  
Cell:              a=11.2079(5)      b=13.1431(6)      c=15.1242(7)  
                    alpha=78.113(4)      beta=87.403(4)      gamma=89.899(4)  
Temperature:      200 K



|                | Calculated                                | Reported                                  |
|----------------|-------------------------------------------|-------------------------------------------|
| Volume         | 2177.81(17)                               | 2177.81(17)                               |
| Space group    | P -1                                      | P -1                                      |
| Hall group     | -P 1                                      | -P 1                                      |
| Moiety formula | C25 H21 Cl N5 O5 Pd Si,<br>4(C H Cl3), Cl | C25 H21 Cl N5 O5 Pd Si,<br>4(C H Cl3), Cl |
| Sum formula    | C29 H25 Cl14 N5 O5 Pd Si                  | C29 H25 Cl14 N5 O5 Pd Si                  |
| Mr             | 1154.33                                   | 1154.33                                   |
| Dx,g cm-3      | 1.760                                     | 1.760                                     |
| Z              | 2                                         | 2                                         |
| Mu (mm-1)      | 1.357                                     | 1.357                                     |
| F000           | 1144.0                                    | 1144.0                                    |
| F000'          | 1146.60                                   |                                           |
| h,k,lmax       | 14,16,19                                  | 14,16,19                                  |
| Nref           | 9512                                      | 9502                                      |
| Tmin,Tmax      | 0.672,0.873                               | 0.694,0.891                               |
| Tmin'          | 0.659                                     |                                           |

Correction method= # Reported T Limits: Tmin=0.694 Tmax=0.891  
AbsCorr = INTEGRATION

Data completeness= 0.999                      Theta(max)= 26.999

R(reflections)= 0.0230( 8590)              wR2(reflections)= 0.0577( 9502)

S = 1.059                                      Npar= 562

The following ALERTS were generated. Each ALERT has the format

**test-name\_ALERT\_alert-type\_alert-level.**

Click on the hyperlinks for more details of the test.

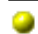

#### Alert level C

PLAT244\_ALERT\_4\_C Low              'Solvent' Ueq as Compared to Neighbors of              C28 Check

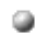

#### Alert level G

|                   |                                                                 |       |        |
|-------------------|-----------------------------------------------------------------|-------|--------|
| PLAT002_ALERT_2_G | Number of Distance or Angle Restraints on AtSite                | 8     | Note   |
| PLAT154_ALERT_1_G | The s.u.'s on the Cell Angles are Equal ..(Note)                | 0.004 | Degree |
| PLAT171_ALERT_4_G | The CIF-Embedded .res File Contains EADP Records                | 2     | Report |
| PLAT176_ALERT_4_G | The CIF-Embedded .res File Contains SADI Records                | 4     | Report |
| PLAT232_ALERT_2_G | Hirshfeld Test Diff (M-X) Pd1              --Cl1              . | 22.0  | s.u.   |
| PLAT302_ALERT_4_G | Anion/Solvent/Minor-Residue Disorder (Resd 2 )                  | 100%  | Note   |
| PLAT302_ALERT_4_G | Anion/Solvent/Minor-Residue Disorder (Resd 3 )                  | 100%  | Note   |
| PLAT302_ALERT_4_G | Anion/Solvent/Minor-Residue Disorder (Resd 6 )                  | 100%  | Note   |
| PLAT302_ALERT_4_G | Anion/Solvent/Minor-Residue Disorder (Resd 7 )                  | 100%  | Note   |
| PLAT304_ALERT_4_G | Non-Integer Number of Atoms in ..... Resd 2                     | 3.49  | Check  |
| PLAT304_ALERT_4_G | Non-Integer Number of Atoms in ..... Resd 3                     | 3.20  | Check  |
| PLAT304_ALERT_4_G | Non-Integer Number of Atoms in ..... Resd 6                     | 1.51  | Check  |
| PLAT304_ALERT_4_G | Non-Integer Number of Atoms in ..... Resd 7                     | 1.80  | Check  |
| PLAT395_ALERT_2_G | Deviating X-O-Y              Angle From 120 for O1              | 128.0 | Degree |
| PLAT395_ALERT_2_G | Deviating X-O-Y              Angle From 120 for O2              | 127.2 | Degree |
| PLAT395_ALERT_2_G | Deviating X-O-Y              Angle From 120 for O3              | 126.6 | Degree |



PLAT395\_ALERT\_2\_G Deviating X-O-Y Angle From 120 for O4 127.1 Degree  
 PLAT395\_ALERT\_2\_G Deviating X-O-Y Angle From 120 for O5 131.7 Degree  
 PLAT794\_ALERT\_5\_G Tentative Bond Valency for Pd1 (II) . 2.33 Info  
 PLAT860\_ALERT\_3\_G Number of Least-Squares Restraints ..... 12 Note

---

0 **ALERT level A** = Most likely a serious problem - resolve or explain  
 0 **ALERT level B** = A potentially serious problem, consider carefully  
 1 **ALERT level C** = Check. Ensure it is not caused by an omission or oversight  
 20 **ALERT level G** = General information/check it is not something unexpected

1 ALERT type 1 CIF construction/syntax error, inconsistent or missing data  
 7 ALERT type 2 Indicator that the structure model may be wrong or deficient  
 1 ALERT type 3 Indicator that the structure quality may be low  
 11 ALERT type 4 Improvement, methodology, query or suggestion  
 1 ALERT type 5 Informative message, check

---

## Datablock: compound\_5\_2CHCl3

---

Bond precision: C-C = 0.0132 Å Wavelength=0.71073

Cell: a=22.458(2) b=11.8102(7) c=17.4818(18)  
 alpha=90 beta=111.330(7) gamma=90  
 Temperature: 200 K

|                        | Calculated                           | Reported                             |
|------------------------|--------------------------------------|--------------------------------------|
| Volume                 | 4319.2(7)                            | 4319.1(7)                            |
| Space group            | C 2/c                                | C 2/c                                |
| Hall group             | -C 2yc                               | -C 2yc                               |
| Moiety formula         | C30 H26 Cl4 N6 O6 Pd2 Si, 2(C H Cl3) | C30 H26 Cl4 N6 O6 Pd2 Si, 2(C H Cl3) |
| Sum formula            | C32 H28 Cl10 N6 O6 Pd2 Si            | C32 H28 Cl10 N6 O6 Pd2 Si            |
| Mr                     | 1187.99                              | 1187.99                              |
| Dx, g cm <sup>-3</sup> | 1.827                                | 1.827                                |
| Z                      | 4                                    | 4                                    |
| Mu (mm <sup>-1</sup> ) | 1.529                                | 1.529                                |
| F000                   | 2344.0                               | 2344.0                               |
| F000'                  | 2342.91                              |                                      |
| h,k,lmax               | 26,14,20                             | 26,14,20                             |
| Nref                   | 3800                                 | 3789                                 |
| Tmin,Tmax              | 0.863,0.970                          | 0.926,0.990                          |
| Tmin'                  | 0.832                                |                                      |

Correction method= # Reported T Limits: Tmin=0.926 Tmax=0.990  
 AbsCorr = INTEGRATION

Data completeness= 0.997 Theta(max)= 24.999

R(reflections)= 0.0474( 2903) wR2(reflections)= 0.1166( 16169)



S = 1.034

Npar= 289

---

The following ALERTS were generated. Each ALERT has the format

**test-name\_ALERT\_alert-type\_alert-level.**

Click on the hyperlinks for more details of the test.

---

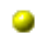

#### Alert level C

PLAT342\_ALERT\_3\_C Low Bond Precision on C-C Bonds ..... 0.01317 Ang.

---



#### Alert level G

|                   |                                                  |       |        |
|-------------------|--------------------------------------------------|-------|--------|
| PLAT002_ALERT_2_G | Number of Distance or Angle Restraints on AtSite | 8     | Note   |
| PLAT171_ALERT_4_G | The CIF-Embedded .res File Contains EADP Records | 2     | Report |
| PLAT176_ALERT_4_G | The CIF-Embedded .res File Contains SADI Records | 3     | Report |
| PLAT302_ALERT_4_G | Anion/Solvent/Minor-Residue Disorder (Resd 2 )   | 100%  | Note   |
| PLAT302_ALERT_4_G | Anion/Solvent/Minor-Residue Disorder (Resd 3 )   | 100%  | Note   |
| PLAT304_ALERT_4_G | Non-Integer Number of Atoms in ..... Resd 2      | 3.30  | Check  |
| PLAT304_ALERT_4_G | Non-Integer Number of Atoms in ..... Resd 3      | 1.70  | Check  |
| PLAT395_ALERT_2_G | Deviating X-O-Y Angle From 120 for O1            | 127.8 | Degree |
| PLAT395_ALERT_2_G | Deviating X-O-Y Angle From 120 for O2            | 124.5 | Degree |
| PLAT395_ALERT_2_G | Deviating X-O-Y Angle From 120 for O3            | 136.7 | Degree |
| PLAT794_ALERT_5_G | Tentative Bond Valency for Pd1 (II) .            | 2.13  | Info   |
| PLAT860_ALERT_3_G | Number of Least-Squares Restraints .....         | 9     | Note   |
| PLAT870_ALERT_4_G | ALERTS Related to Twinning Effects Suppressed .. | !     | Info   |
| PLAT933_ALERT_2_G | Number of OMIT Records in Embedded .res File ... | 17    | Note   |

---

0 **ALERT level A** = Most likely a serious problem - resolve or explain  
0 **ALERT level B** = A potentially serious problem, consider carefully  
1 **ALERT level C** = Check. Ensure it is not caused by an omission or oversight  
14 **ALERT level G** = General information/check it is not something unexpected

0 ALERT type 1 CIF construction/syntax error, inconsistent or missing data  
5 ALERT type 2 Indicator that the structure model may be wrong or deficient  
2 ALERT type 3 Indicator that the structure quality may be low  
7 ALERT type 4 Improvement, methodology, query or suggestion  
1 ALERT type 5 Informative message, check

---

## Datablock: compound\_5\_6CHCl3

---

Bond precision: C-C = 0.0055 A

Wavelength=0.71073

Cell: a=12.1698(6) b=12.1951(7) c=13.1643(8)  
alpha=107.904(4) beta=103.147(4) gamma=114.671(4)  
Temperature: 200 K



|                | Calculated                              | Reported                                |
|----------------|-----------------------------------------|-----------------------------------------|
| Volume         | 1539.81(19)                             | 1539.81(19)                             |
| Space group    | P -1                                    | P -1                                    |
| Hall group     | -P 1                                    | -P 1                                    |
| Moiety formula | C30 H26 Cl4 N6 O6 Pd2 Si,<br>6(C H Cl3) | C30 H26 Cl4 N6 O6 Pd2 Si,<br>6(C H Cl3) |
| Sum formula    | C36 H32 Cl22 N6 O6 Pd2 Si               | C36 H32 Cl22 N6 O6 Pd2 Si               |
| Mr             | 1665.47                                 | 1665.46                                 |
| Dx,g cm-3      | 1.796                                   | 1.796                                   |
| Z              | 1                                       | 1                                       |
| Mu (mm-1)      | 1.604                                   | 1.604                                   |
| F000           | 818.0                                   | 818.0                                   |
| F000'          | 819.53                                  |                                         |
| h,k,lmax       | 15,15,16                                | 15,15,16                                |
| Nref           | 6736                                    | 6728                                    |
| Tmin,Tmax      | 0.687,0.786                             | 0.712,0.848                             |
| Tmin'          | 0.663                                   |                                         |

Correction method= # Reported T Limits: Tmin=0.712 Tmax=0.848  
AbsCorr = INTEGRATION

Data completeness= 0.999                      Theta(max)= 26.999

R(reflections)= 0.0331( 5683)              wR2(reflections)= 0.0776( 6728)

S = 1.055                                      Npar= 410

The following ALERTS were generated. Each ALERT has the format  
**test-name\_ALERT\_alert-type\_alert-level.**  
Click on the hyperlinks for more details of the test.

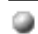

#### Alert level G

|                   |                                                  |       |        |
|-------------------|--------------------------------------------------|-------|--------|
| PLAT002_ALERT_2_G | Number of Distance or Angle Restraints on AtSite | 20    | Note   |
| PLAT154_ALERT_1_G | The s.u.'s on the Cell Angles are Equal ..(Note) | 0.004 | Degree |
| PLAT171_ALERT_4_G | The CIF-Embedded .res File Contains EADP Records | 6     | Report |
| PLAT176_ALERT_4_G | The CIF-Embedded .res File Contains SADI Records | 6     | Report |
| PLAT302_ALERT_4_G | Anion/Solvent/Minor-Residue Disorder (Resd 2 )   | 100%  | Note   |
| PLAT302_ALERT_4_G | Anion/Solvent/Minor-Residue Disorder (Resd 3 )   | 100%  | Note   |
| PLAT302_ALERT_4_G | Anion/Solvent/Minor-Residue Disorder (Resd 4 )   | 100%  | Note   |
| PLAT302_ALERT_4_G | Anion/Solvent/Minor-Residue Disorder (Resd 5 )   | 100%  | Note   |
| PLAT302_ALERT_4_G | Anion/Solvent/Minor-Residue Disorder (Resd 6 )   | 100%  | Note   |
| PLAT302_ALERT_4_G | Anion/Solvent/Minor-Residue Disorder (Resd 7 )   | 100%  | Note   |
| PLAT304_ALERT_4_G | Non-Integer Number of Atoms in ..... Resd 2      | 3.15  | Check  |
| PLAT304_ALERT_4_G | Non-Integer Number of Atoms in ..... Resd 3      | 2.59  | Check  |
| PLAT304_ALERT_4_G | Non-Integer Number of Atoms in ..... Resd 4      | 4.42  | Check  |
| PLAT304_ALERT_4_G | Non-Integer Number of Atoms in ..... Resd 5      | 1.84  | Check  |
| PLAT304_ALERT_4_G | Non-Integer Number of Atoms in ..... Resd 6      | 2.41  | Check  |
| PLAT304_ALERT_4_G | Non-Integer Number of Atoms in ..... Resd 7      | 0.58  | Check  |
| PLAT395_ALERT_2_G | Deviating X-O-Y Angle From 120 for O1            | 124.0 | Degree |
| PLAT395_ALERT_2_G | Deviating X-O-Y Angle From 120 for O2            | 128.2 | Degree |
| PLAT395_ALERT_2_G | Deviating X-O-Y Angle From 120 for O3            | 134.2 | Degree |
| PLAT794_ALERT_5_G | Tentative Bond Valency for Pd1 (II)              | 2.12  | Info   |



PLAT811\_ALERT\_5\_G No ADDSYM Analysis: Too Many Excluded Atoms .... ! Info  
 PLAT860\_ALERT\_3\_G Number of Least-Squares Restraints ..... 66 Note  
 PLAT933\_ALERT\_2\_G Number of OMIT Records in Embedded .res File ... 1 Note

---

0 **ALERT level A** = Most likely a serious problem - resolve or explain  
 0 **ALERT level B** = A potentially serious problem, consider carefully  
 0 **ALERT level C** = Check. Ensure it is not caused by an omission or oversight  
 23 **ALERT level G** = General information/check it is not something unexpected

1 ALERT type 1 CIF construction/syntax error, inconsistent or missing data  
 5 ALERT type 2 Indicator that the structure model may be wrong or deficient  
 1 ALERT type 3 Indicator that the structure quality may be low  
 14 ALERT type 4 Improvement, methodology, query or suggestion  
 2 ALERT type 5 Informative message, check

---

## Datablock: compound\_5\_8CHCl3

---

Bond precision: C-C = 0.0042 A Wavelength=0.71073

Cell: a=12.3681(5) b=13.1356(4) c=22.2337(9)  
 alpha=90 beta=95.990(3) gamma=90  
 Temperature: 200 K

|                | Calculated                           | Reported                             |
|----------------|--------------------------------------|--------------------------------------|
| Volume         | 3592.4(2)                            | 3592.4(2)                            |
| Space group    | P 21/n                               | P 21/n                               |
| Hall group     | -P 2yn                               | -P 2yn                               |
| Moiety formula | C30 H26 Cl4 N6 O6 Pd2 Si, 8(C H Cl3) | C30 H26 Cl4 N6 O6 Pd2 Si, 8(C H Cl3) |
| Sum formula    | C38 H34 Cl28 N6 O6 Pd2 Si            | C38 H34 Cl28 N6 O6 Pd2 Si            |
| Mr             | 1904.44                              | 1904.20                              |
| Dx,g cm-3      | 1.761                                | 1.760                                |
| Z              | 2                                    | 2                                    |
| Mu (mm-1)      | 1.603                                | 1.603                                |
| F000           | 1868.2                               | 1868.0                               |
| F000'          | 1873.10                              |                                      |
| h,k,lmax       | 15,16,28                             | 15,16,28                             |
| Nref           | 7837                                 | 7828                                 |
| Tmin,Tmax      | 0.687,0.786                          | 0.541,0.742                          |
| Tmin'          | 0.612                                |                                      |

Correction method= # Reported T Limits: Tmin=0.541 Tmax=0.742  
 AbsCorr = INTEGRATION

Data completeness= 0.999 Theta(max)= 26.999

R(reflections)= 0.0299( 6609) wR2(reflections)= 0.0699( 7828)



S = 1.033

Npar= 539

The following ALERTS were generated. Each ALERT has the format

**test-name\_ALERT\_alert-type\_alert-level.**

Click on the hyperlinks for more details of the test.

### Alert level C

PLAT352\_ALERT\_3\_C Short N-H (X0.87,N1.01A) N3 - H3N . 0.72 Ang.

### Alert level G

|                   |                                                  |       |              |
|-------------------|--------------------------------------------------|-------|--------------|
| PLAT002_ALERT_2_G | Number of Distance or Angle Restraints on AtSite | 28    | Note         |
| PLAT003_ALERT_2_G | Number of Uiso or Uij Restrained non-H Atoms ... | 12    | Report       |
| PLAT068_ALERT_1_G | Reported F000 Differs from Calcd (or Missing)... |       | Please Check |
| PLAT171_ALERT_4_G | The CIF-Embedded .res File Contains EADP Records | 3     | Report       |
| PLAT176_ALERT_4_G | The CIF-Embedded .res File Contains SADI Records | 9     | Report       |
| PLAT177_ALERT_4_G | The CIF-Embedded .res File Contains DELU Records | 3     | Report       |
| PLAT178_ALERT_4_G | The CIF-Embedded .res File Contains SIMU Records | 3     | Report       |
| PLAT302_ALERT_4_G | Anion/Solvent/Minor-Residue Disorder (Resd 2 )   | 100%  | Note         |
| PLAT302_ALERT_4_G | Anion/Solvent/Minor-Residue Disorder (Resd 3 )   | 100%  | Note         |
| PLAT302_ALERT_4_G | Anion/Solvent/Minor-Residue Disorder (Resd 4 )   | 100%  | Note         |
| PLAT302_ALERT_4_G | Anion/Solvent/Minor-Residue Disorder (Resd 5 )   | 100%  | Note         |
| PLAT302_ALERT_4_G | Anion/Solvent/Minor-Residue Disorder (Resd 6 )   | 100%  | Note         |
| PLAT302_ALERT_4_G | Anion/Solvent/Minor-Residue Disorder (Resd 7 )   | 100%  | Note         |
| PLAT302_ALERT_4_G | Anion/Solvent/Minor-Residue Disorder (Resd 8 )   | 100%  | Note         |
| PLAT302_ALERT_4_G | Anion/Solvent/Minor-Residue Disorder (Resd 9 )   | 100%  | Note         |
| PLAT302_ALERT_4_G | Anion/Solvent/Minor-Residue Disorder (Resd 10 )  | 100%  | Note         |
| PLAT304_ALERT_4_G | Non-Integer Number of Atoms in ..... Resd 2      | 2.78  | Check        |
| PLAT304_ALERT_4_G | Non-Integer Number of Atoms in ..... Resd 3      | 3.76  | Check        |
| PLAT304_ALERT_4_G | Non-Integer Number of Atoms in ..... Resd 4      | 3.10  | Check        |
| PLAT304_ALERT_4_G | Non-Integer Number of Atoms in ..... Resd 5      | 1.46  | Check        |
| PLAT304_ALERT_4_G | Non-Integer Number of Atoms in ..... Resd 6      | 2.27  | Check        |
| PLAT304_ALERT_4_G | Non-Integer Number of Atoms in ..... Resd 7      | 1.28  | Check        |
| PLAT304_ALERT_4_G | Non-Integer Number of Atoms in ..... Resd 8      | 2.22  | Check        |
| PLAT304_ALERT_4_G | Non-Integer Number of Atoms in ..... Resd 9      | 1.90  | Check        |
| PLAT304_ALERT_4_G | Non-Integer Number of Atoms in ..... Resd 10     | 1.24  | Check        |
| PLAT395_ALERT_2_G | Deviating X-O-Y Angle From 120 for O1            | 126.4 | Degree       |
| PLAT395_ALERT_2_G | Deviating X-O-Y Angle From 120 for O2            | 124.6 | Degree       |
| PLAT395_ALERT_2_G | Deviating X-O-Y Angle From 120 for O3            | 135.8 | Degree       |
| PLAT794_ALERT_5_G | Tentative Bond Valency for Pd1 (II) .            | 2.13  | Info         |
| PLAT811_ALERT_5_G | No ADDSYM Analysis: Too Many Excluded Atoms .... |       | ! Info       |
| PLAT860_ALERT_3_G | Number of Least-Squares Restraints .....         | 166   | Note         |
| PLAT933_ALERT_2_G | Number of OMIT Records in Embedded .res File ... | 1     | Note         |

0 **ALERT level A** = Most likely a serious problem - resolve or explain

0 **ALERT level B** = A potentially serious problem, consider carefully

1 **ALERT level C** = Check. Ensure it is not caused by an omission or oversight

32 **ALERT level G** = General information/check it is not something unexpected

1 ALERT type 1 CIF construction/syntax error, inconsistent or missing data

6 ALERT type 2 Indicator that the structure model may be wrong or deficient

2 ALERT type 3 Indicator that the structure quality may be low

22 ALERT type 4 Improvement, methodology, query or suggestion

2 ALERT type 5 Informative message, check

## Datablock: compound\_6



---

Bond precision: C-C = 0.0078 Å                      Wavelength=0.71073

Cell:                      a=9.1063(8)              b=11.0475(6)              c=17.1744(17)  
                            alpha=90              beta=104.705(7)              gamma=90  
Temperature:              200 K

|                | Calculated               | Reported                 |
|----------------|--------------------------|--------------------------|
| Volume         | 1671.2(2)                | 1671.2(2)                |
| Space group    | P 21/n                   | P 21/n                   |
| Hall group     | -P 2yn                   | -P 2yn                   |
| Moiety formula | C30 H26 Cl4 Cu2 N6 O6 Si | C30 H26 Cl4 Cu2 N6 O6 Si |
| Sum formula    | C30 H26 Cl4 Cu2 N6 O6 Si | C30 H26 Cl4 Cu2 N6 O6 Si |
| Mr             | 863.56                   | 863.54                   |
| Dx,g cm-3      | 1.716                    | 1.716                    |
| Z              | 2                        | 2                        |
| Mu (mm-1)      | 1.682                    | 1.682                    |
| F000           | 872.0                    | 872.0                    |
| F000'          | 874.88                   |                          |
| h,k,lmax       | 10,13,20                 | 10,13,20                 |
| Nref           | 2942                     | 2933                     |
| Tmin,Tmax      | 0.886,0.951              | 0.815,0.927              |
| Tmin'          | 0.777                    |                          |

Correction method= # Reported T Limits: Tmin=0.815 Tmax=0.927  
AbsCorr = INTEGRATION

Data completeness= 0.997                      Theta(max)= 24.998

R(reflections)= 0.0441( 1727)              wR2(reflections)= 0.0907( 2933)

S = 0.924                      Npar= 226

---

The following ALERTS were generated. Each ALERT has the format  
**test-name\_ALERT\_alert-type\_alert-level.**  
Click on the hyperlinks for more details of the test.

---

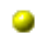

#### Alert level C

PLAT341\_ALERT\_3\_C Low Bond Precision on C-C Bonds ..... 0.00775 Ang.  
PLAT352\_ALERT\_3\_C Short N-H (X0.87,N1.01A) N3 - H3N . 0.74 Ang.

---

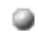

#### Alert level G

PLAT395\_ALERT\_2\_G Deviating X-O-Y Angle From 120 for O1 122.1 Degree  
PLAT395\_ALERT\_2\_G Deviating X-O-Y Angle From 120 for O3 138.6 Degree  
PLAT933\_ALERT\_2\_G Number of OMIT Records in Embedded .res File ... 9 Note

---

0 **ALERT level A** = Most likely a serious problem - resolve or explain  
0 **ALERT level B** = A potentially serious problem, consider carefully



2 **ALERT level C** = Check. Ensure it is not caused by an omission or oversight  
3 **ALERT level G** = General information/check it is not something unexpected

0 **ALERT type 1** CIF construction/syntax error, inconsistent or missing data  
3 **ALERT type 2** Indicator that the structure model may be wrong or deficient  
2 **ALERT type 3** Indicator that the structure quality may be low  
0 **ALERT type 4** Improvement, methodology, query or suggestion  
0 **ALERT type 5** Informative message, check

---

## checkCIF publication errors

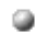

### Alert level G

PUBL017\_ALERT\_1\_G The \_publ\_section\_references section is missing or empty.

---

0 **ALERT level A** = Data missing that is essential or data in wrong format  
1 **ALERT level G** = General alerts. Data that may be required is missing

---

### Publication of your CIF

You should attempt to resolve as many as possible of the alerts in all categories. Often the minor alerts point to easily fixed oversights, errors and omissions in your CIF or refinement strategy, so attention to these fine details can be worthwhile. In order to resolve some of the more serious problems it may be necessary to carry out additional measurements or structure refinements. However, the nature of your study may justify the reported deviations from journal submission requirements and the more serious of these should be commented upon in the discussion or experimental section of a paper or in the "special\_details" fields of the CIF. *checkCIF* was carefully designed to identify outliers and unusual parameters, but every test has its limitations and alerts that are not important in a particular case may appear. Conversely, the absence of alerts does not guarantee there are no aspects of the results needing attention. It is up to the individual to critically assess their own results and, if necessary, seek expert advice.

If you wish to submit your CIF for publication in Acta Crystallographica Section C or E, you should upload your CIF via the web. If you wish to submit your CIF for publication in IUCrData you should upload your CIF via the web. If your CIF is to form part of a submission to another IUCr journal, you will be asked, either during electronic submission or by the Co-editor handling your paper, to upload your CIF via our web site.

---

**PLATON version of 20/08/2018; check.def file version of 20/08/2018**



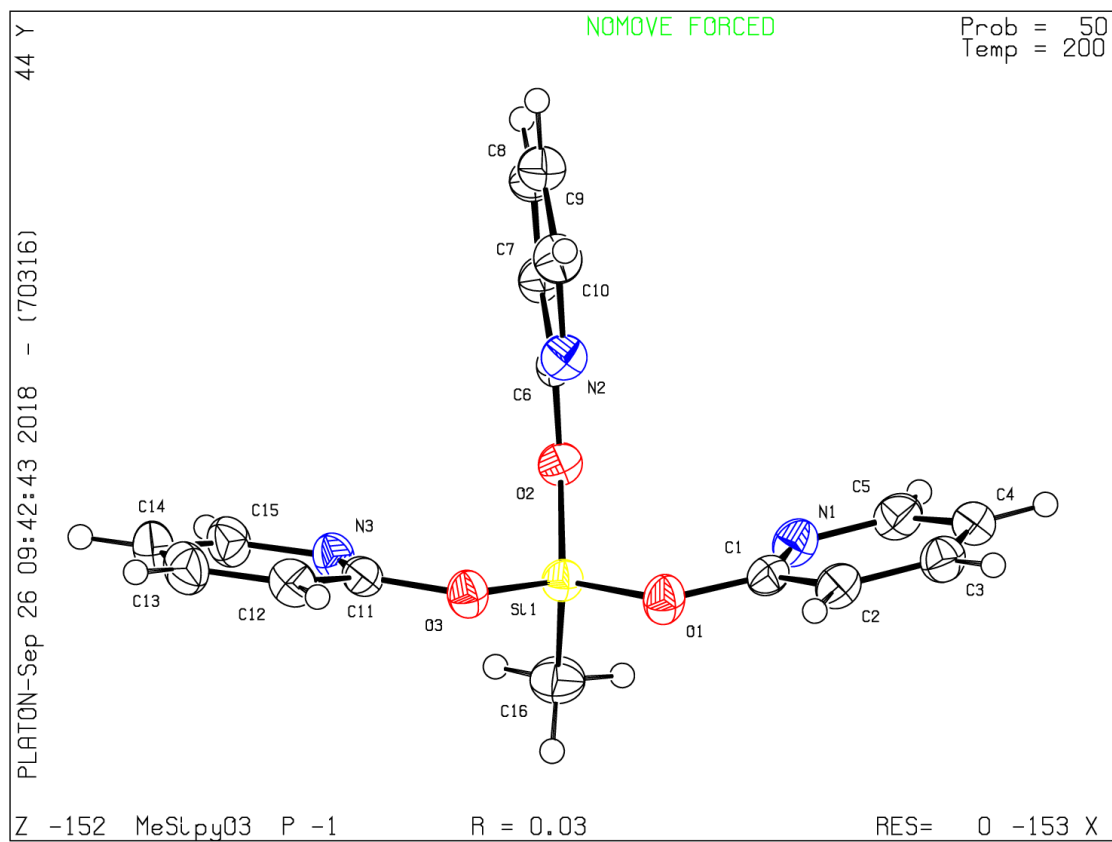



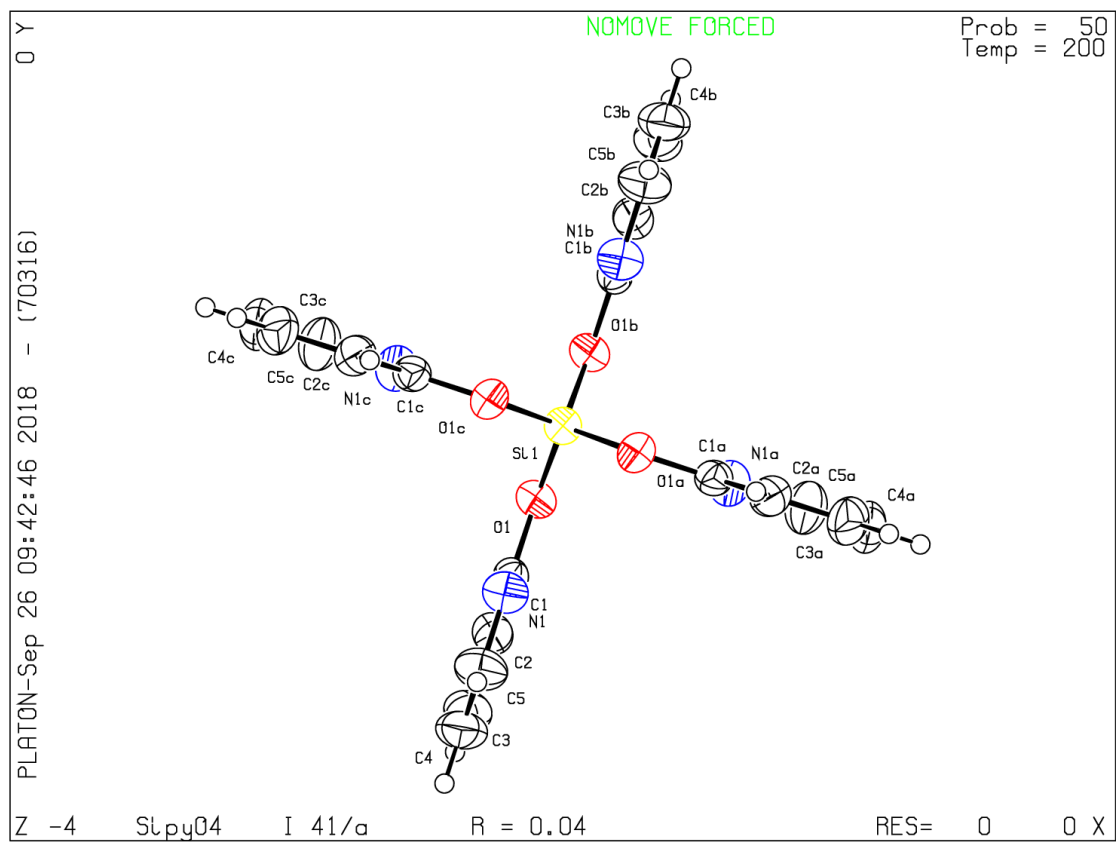



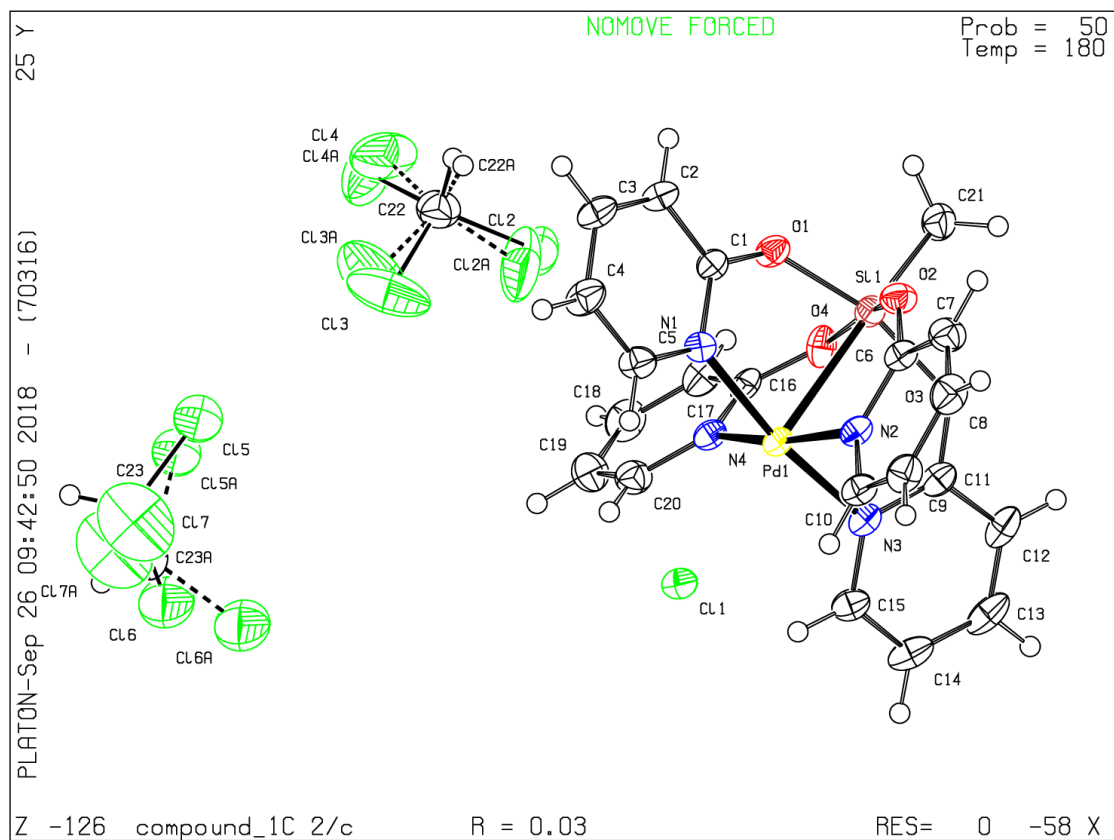



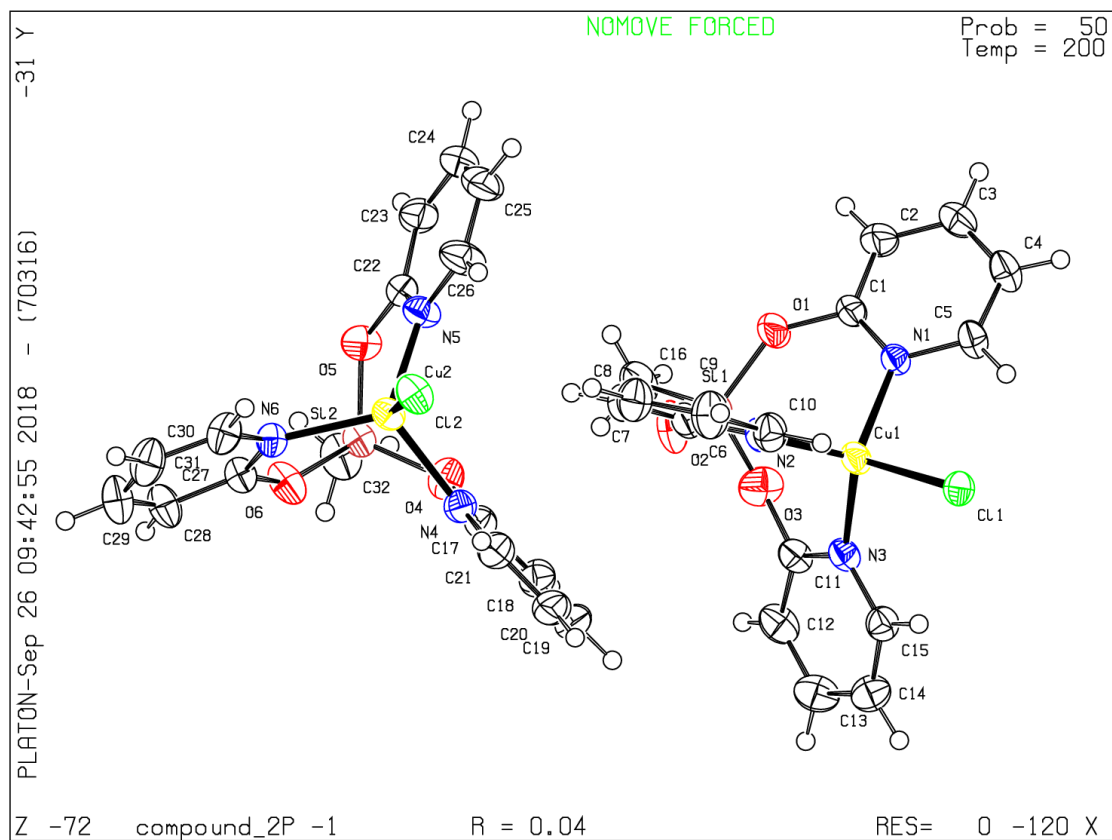



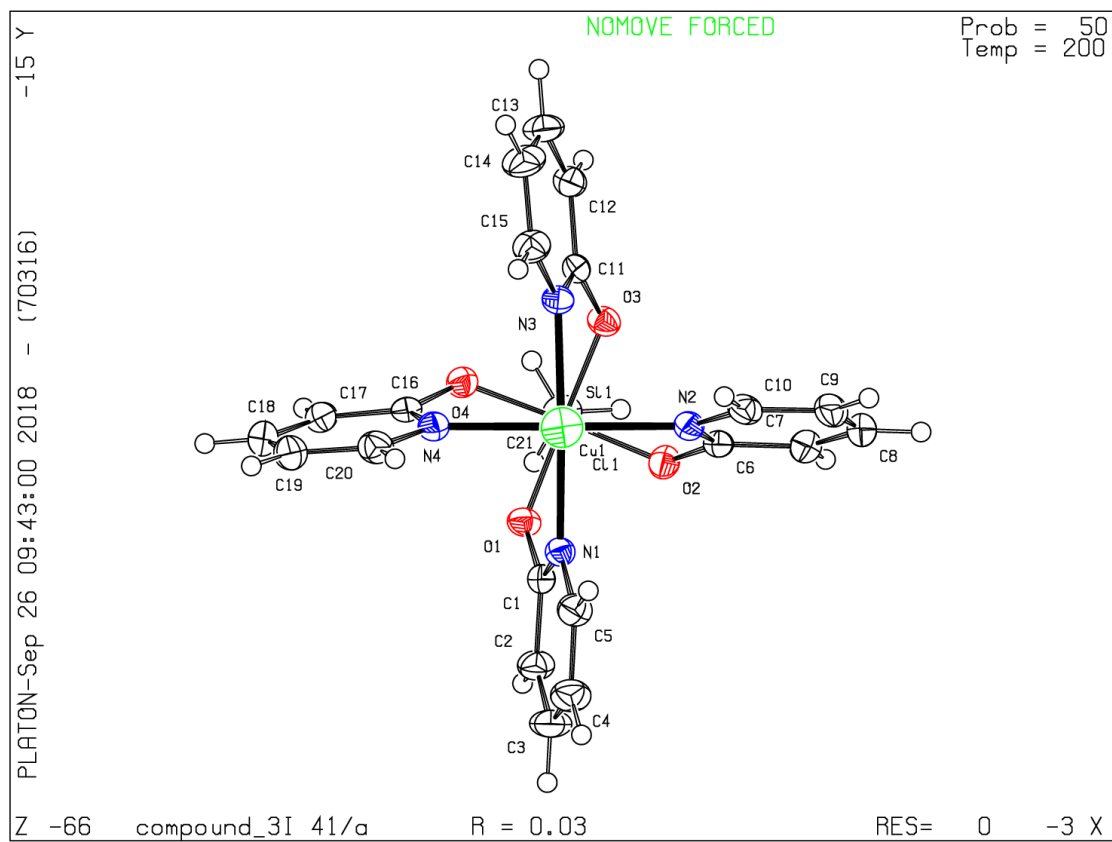



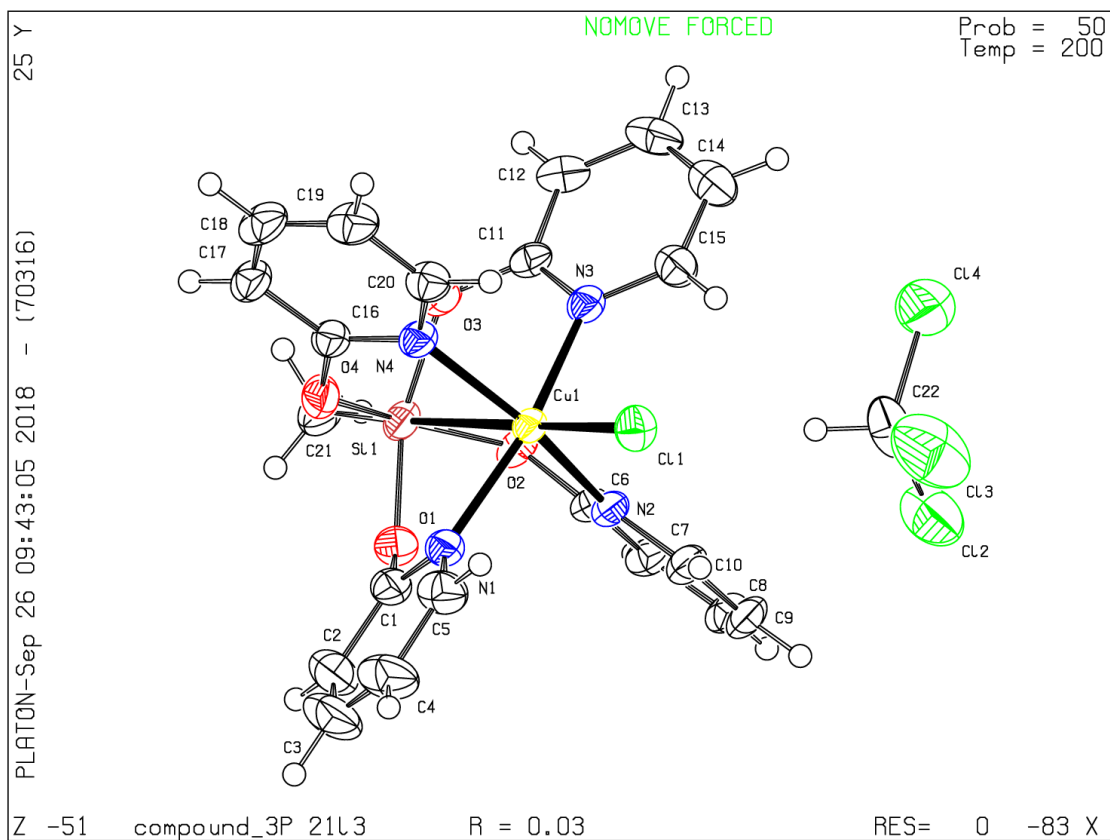



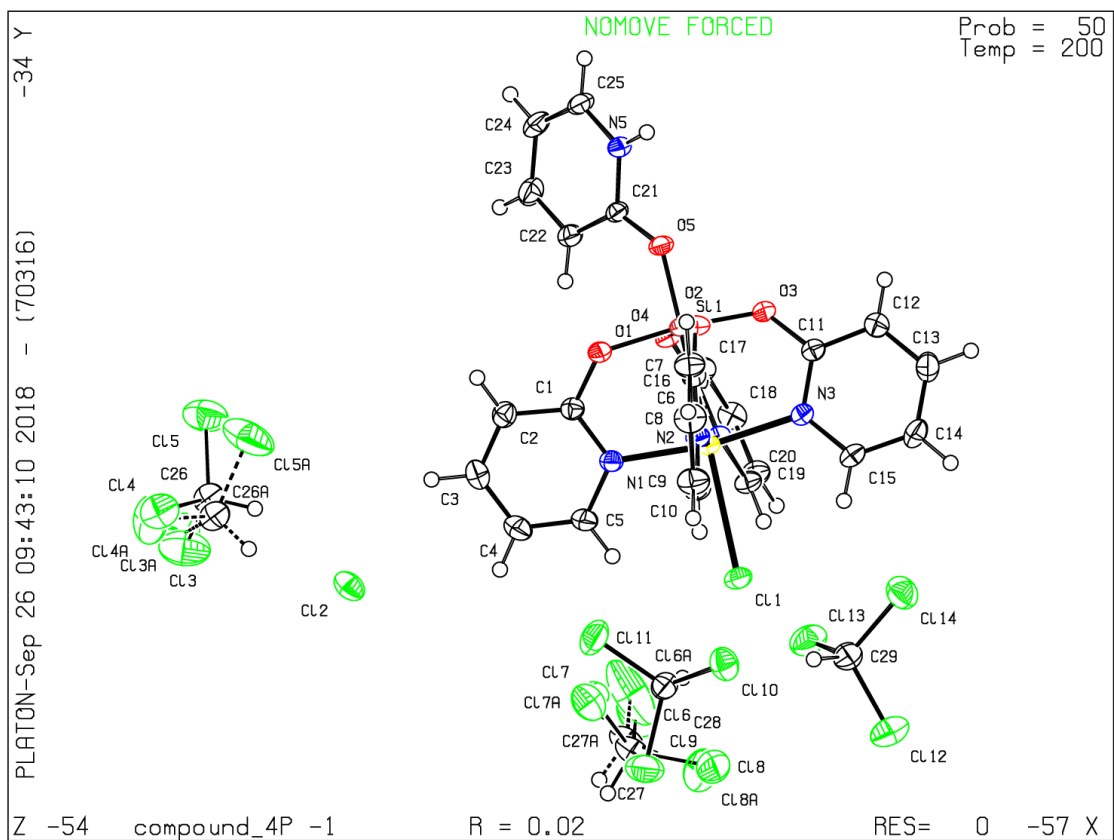



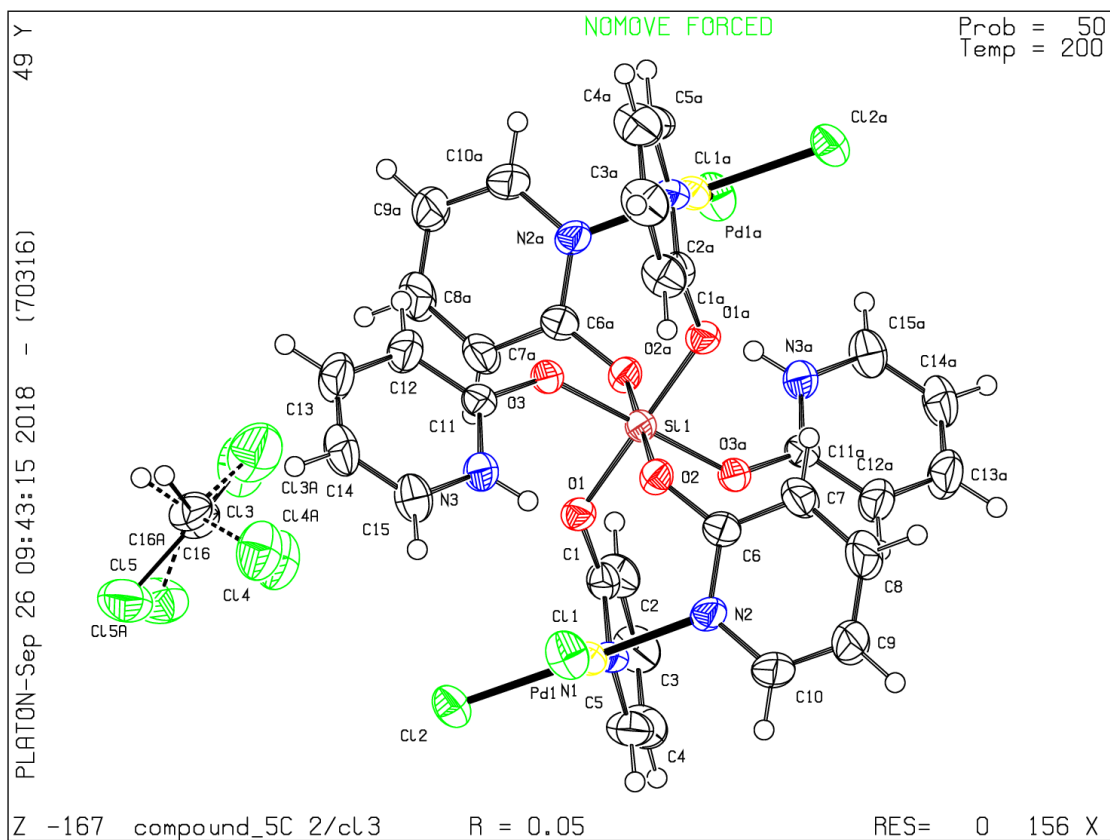



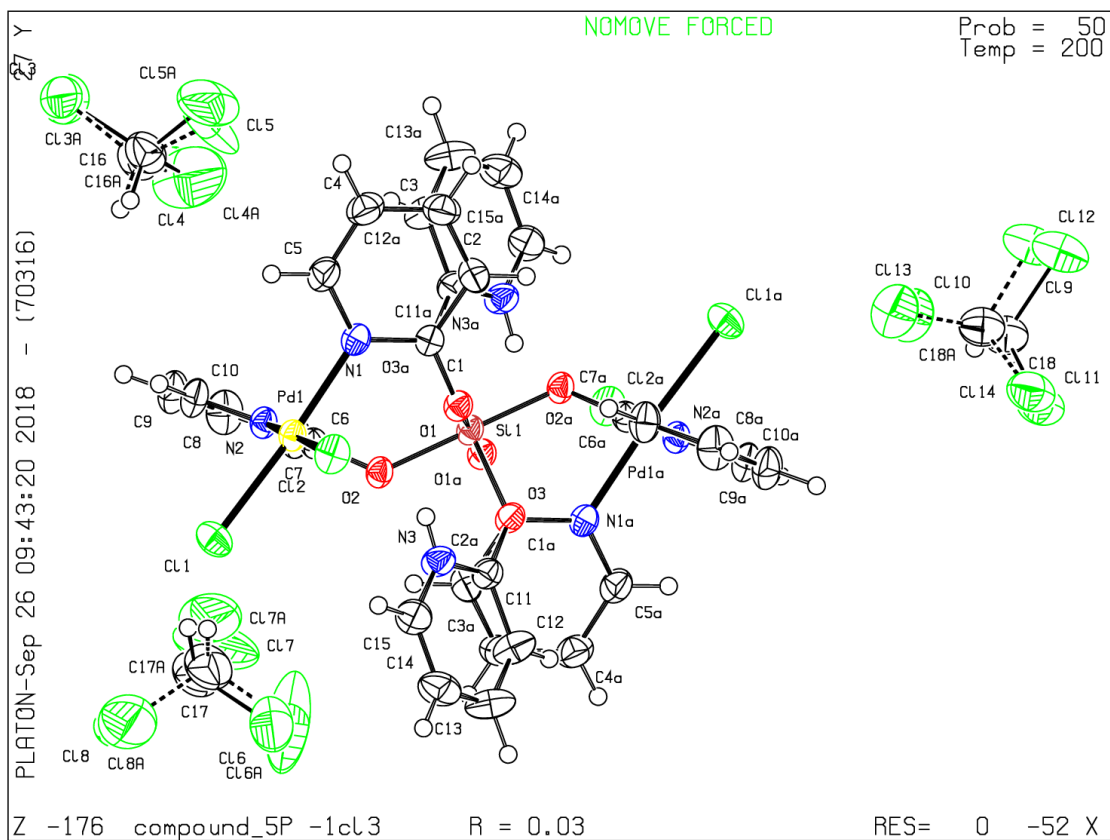



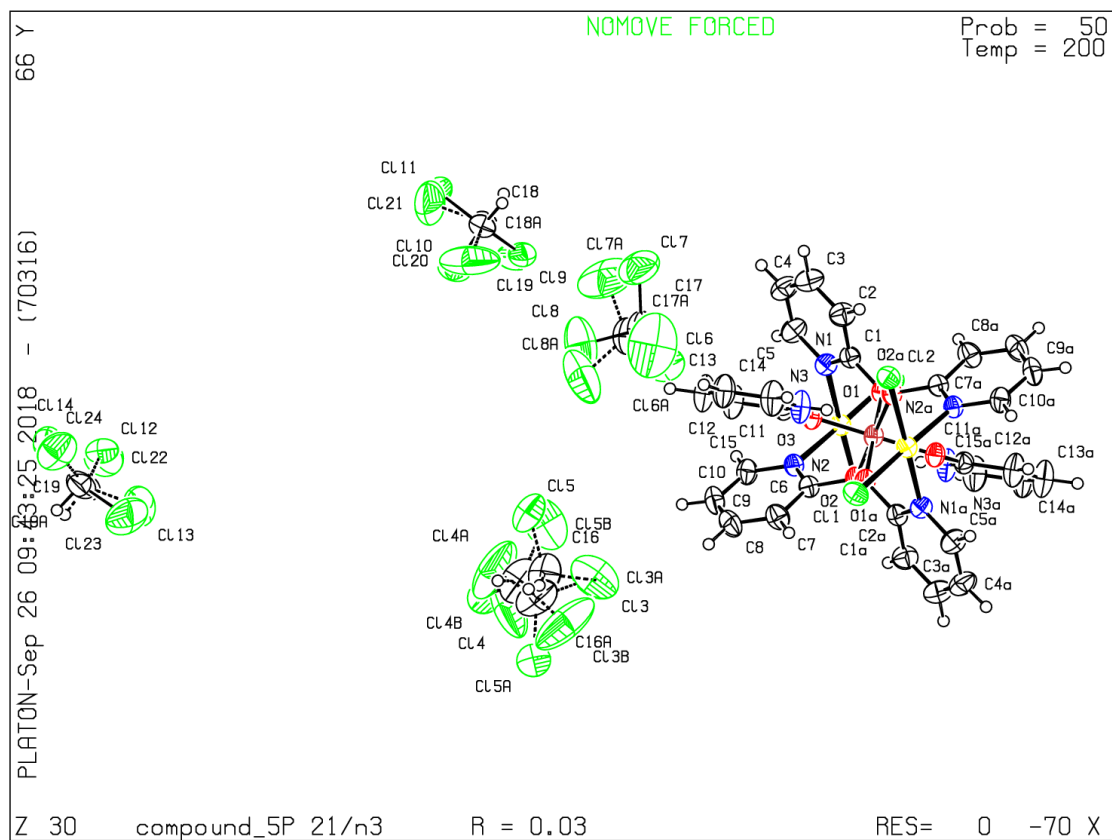



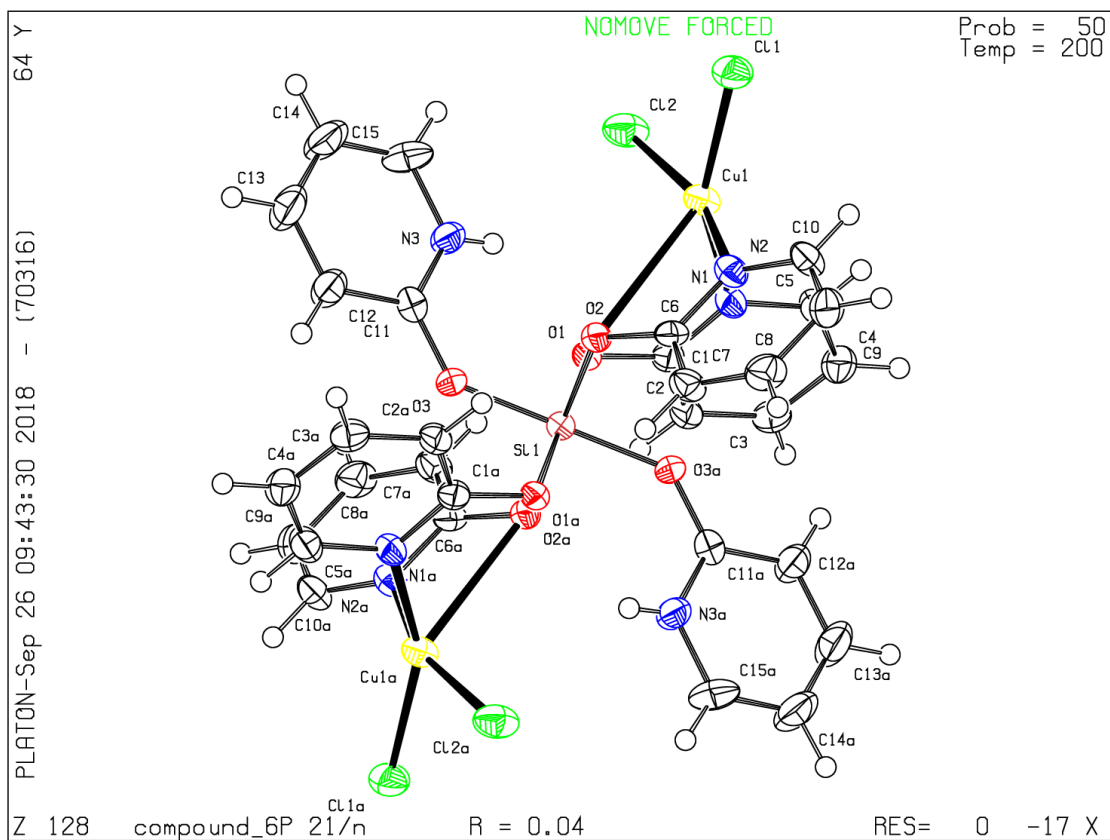

Supplement: s1 [file s1]
